# Supplementary material for: Supra-glacial debris cover changes in the Greater Caucasus from 1986 to 2014
Source: Copernicus journal article supplement (doi:10.5194/tc-14-585-2020), 2020-02-13
Supplement: Supplementary file 1 [file tc-14-585-2020-supplement.zip]

*Supplement of*  
**Supra-glacial debris cover changes in the Greater Caucasus from 1986 to 2014**

Levan G. Tielidze et al.

*Correspondence to:* Levan G. Tielidze (levan.tielidze@tsu.ge)

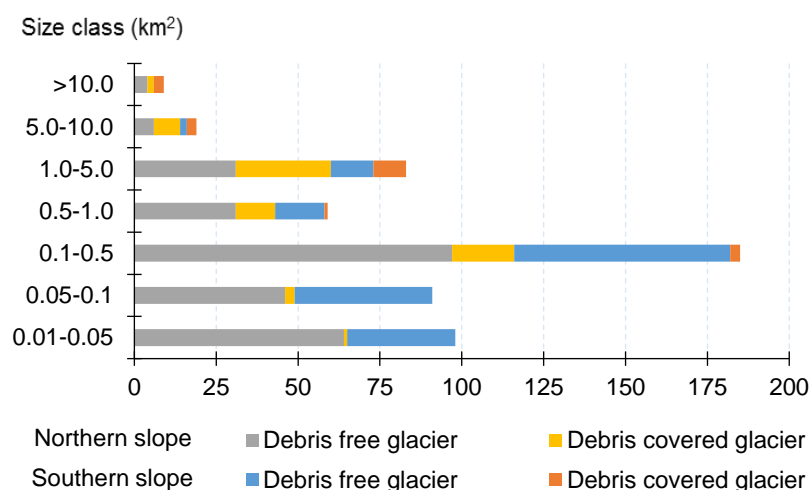

**Figure S1.** The Greater Caucasus glacier size classes with debris-covered and debris-free glaciers distributions for northern and southern slopes.

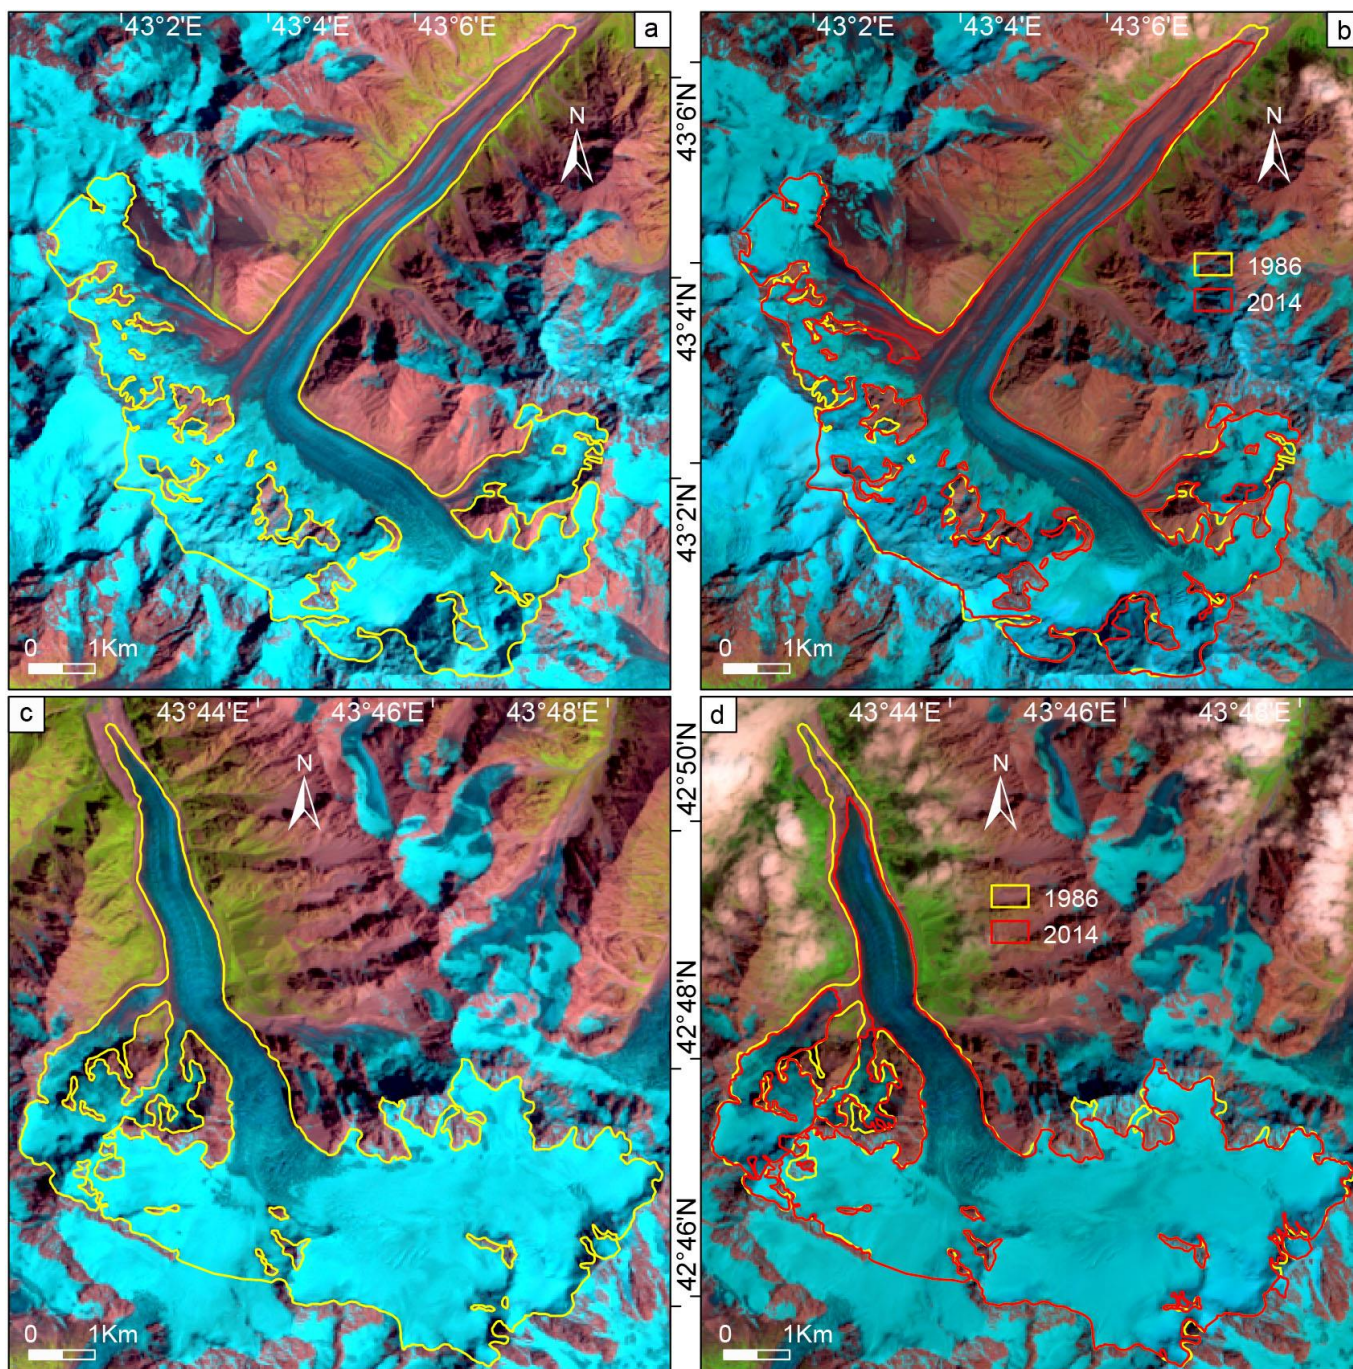

**Figure S2.** Debris-covered Bezingi Glacier retreat between 1986 (a) and 2014 (b); Debris-free Karaugom Glacier retreat between 1986 (c) and 2014 (d).

**Table S1.** Mean upper limit (m asl) of the supra-glacial debris cover for 1986 and 2014 by regions (glaciers are non-existent on southern slopes of the eastern Greater Caucasus).

| Name                            | Elevation,<br>(m asl) 1986 | Elevation,<br>(m asl) 2014 |
|---------------------------------|----------------------------|----------------------------|
| N slope of Western Caucasus     | 2809                       | 2894                       |
| S slope of Western Caucasus     | 2723                       | 2848                       |
| Both slopes of Western Caucasus | 2766                       | 2871                       |
| N slope of Central Caucasus     | 3108                       | 3179                       |
| S slope of Central Caucasus     | 2839                       | 3013                       |
| Both slopes of Central Caucasus | 2974                       | 3096                       |
| N slope of Eastern Caucasus     | 3538                       | 3626                       |
| Elbrus                          | 3343                       | 3521                       |
| <b>Total</b>                    | <b>3015</b>                | <b>3130</b>                |

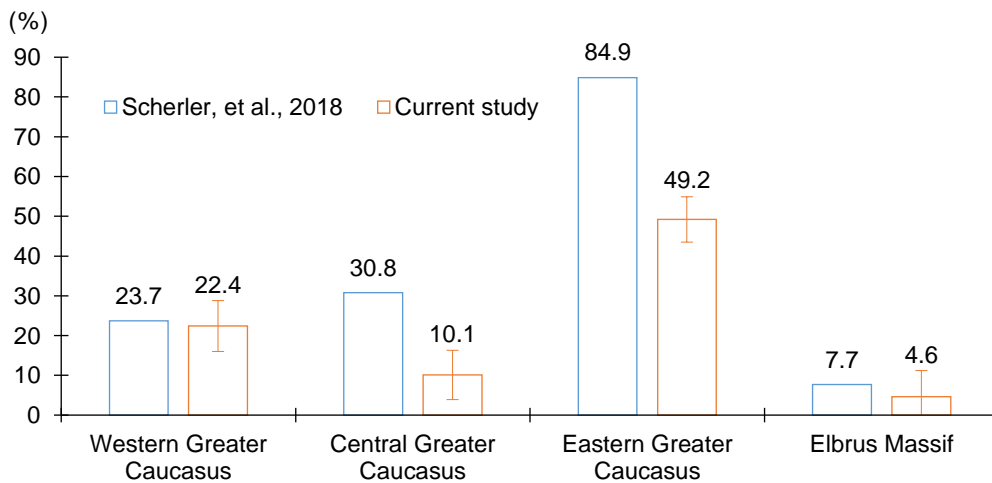

**Figure S3.** Relative supra-glacial debris cover for the western, central, and eastern Greater Caucasus as well as for Elbrus based on the current study, and in comparison to Scherler et al. (2018).



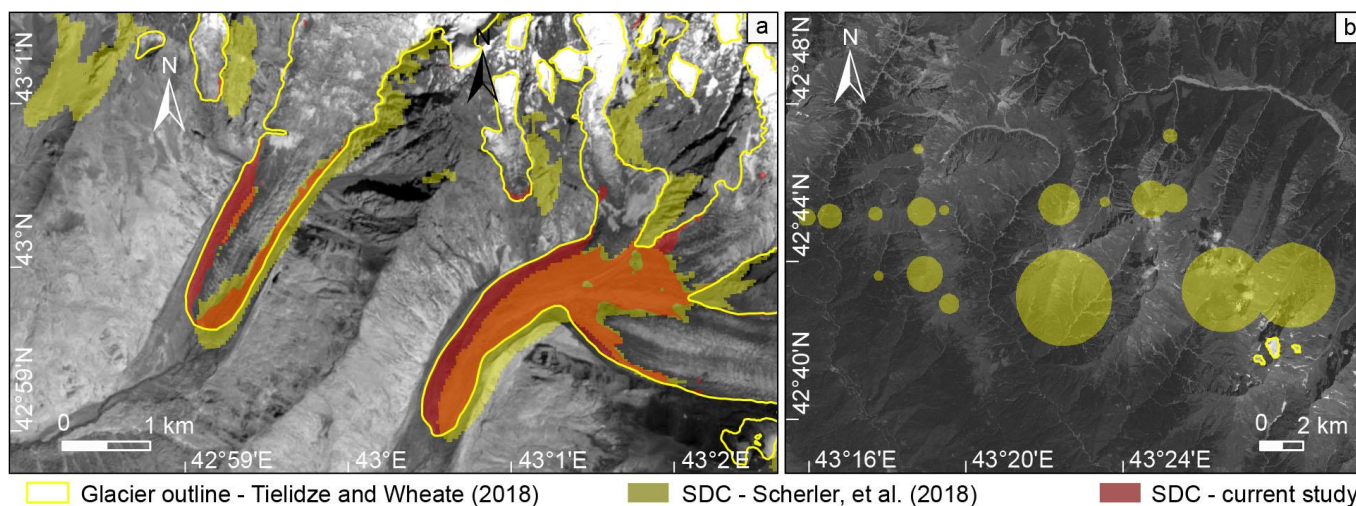

**Figure S4.** a - Comparison of supra-glacial debris cover (SDC) assessment by Scherler, et al. (2018) (based on the RGI v6) and current study. b - An example of the RGI v6 nominal glaciers (circles). According to Scherler et al. (2018), all nominal glaciers were classified as debris-covered. Landsat 8 (panchromatic band 8), 03/08/14 is shown in the background.

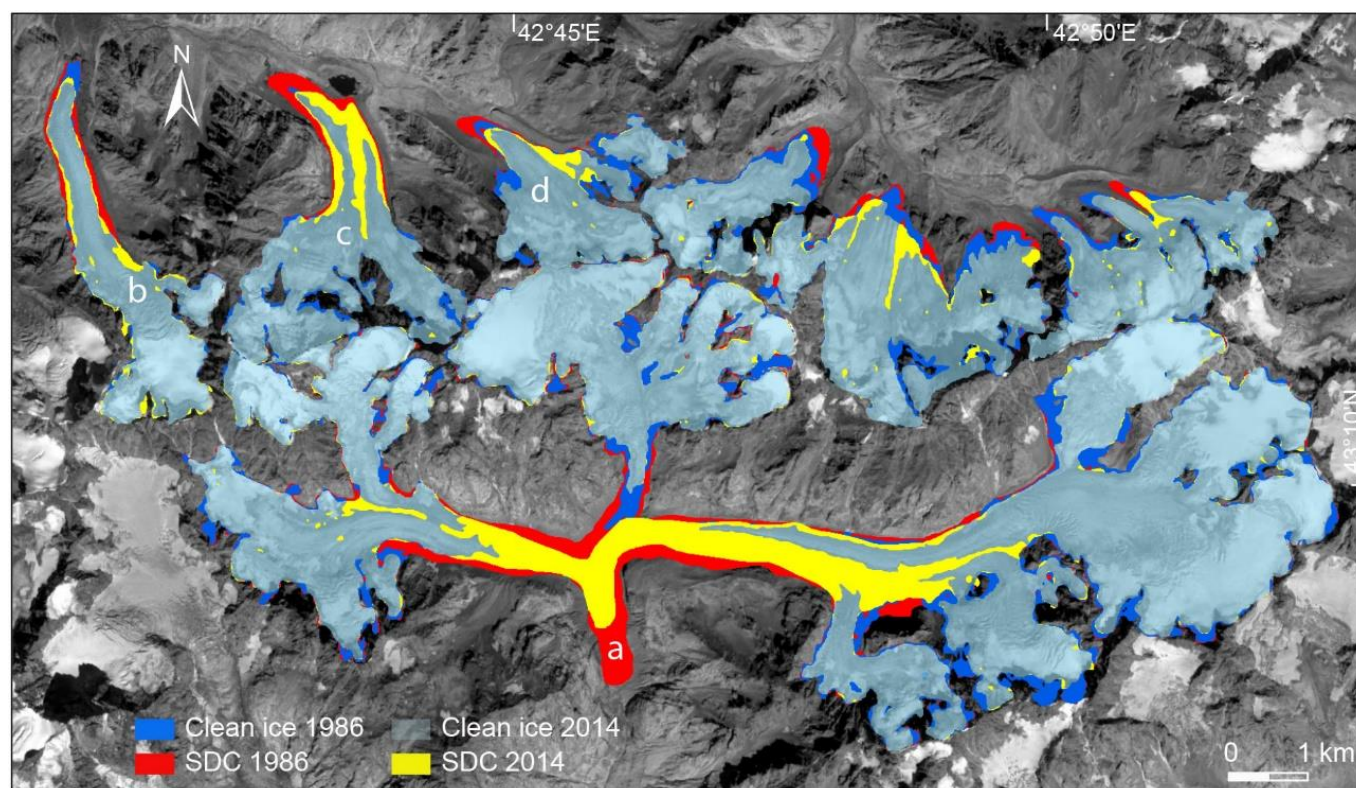

**Figure S5.** Supra-glacial debris cover (SDC) and clean-ice area change in 1986-2014 for the southern (a – Lekhzi) and northern-facing (b – Kashkatash, c – Bashkara, and d – Djankuat) glaciers. Landsat 8 (panchromatic band 8), 03/08/14 is shown in the background. Clean-ice in 1986 consists of the clean-ice 2014 (light blue, transparent) plus clean-ice area that retreated between 1986 and 2014 (dark blue).



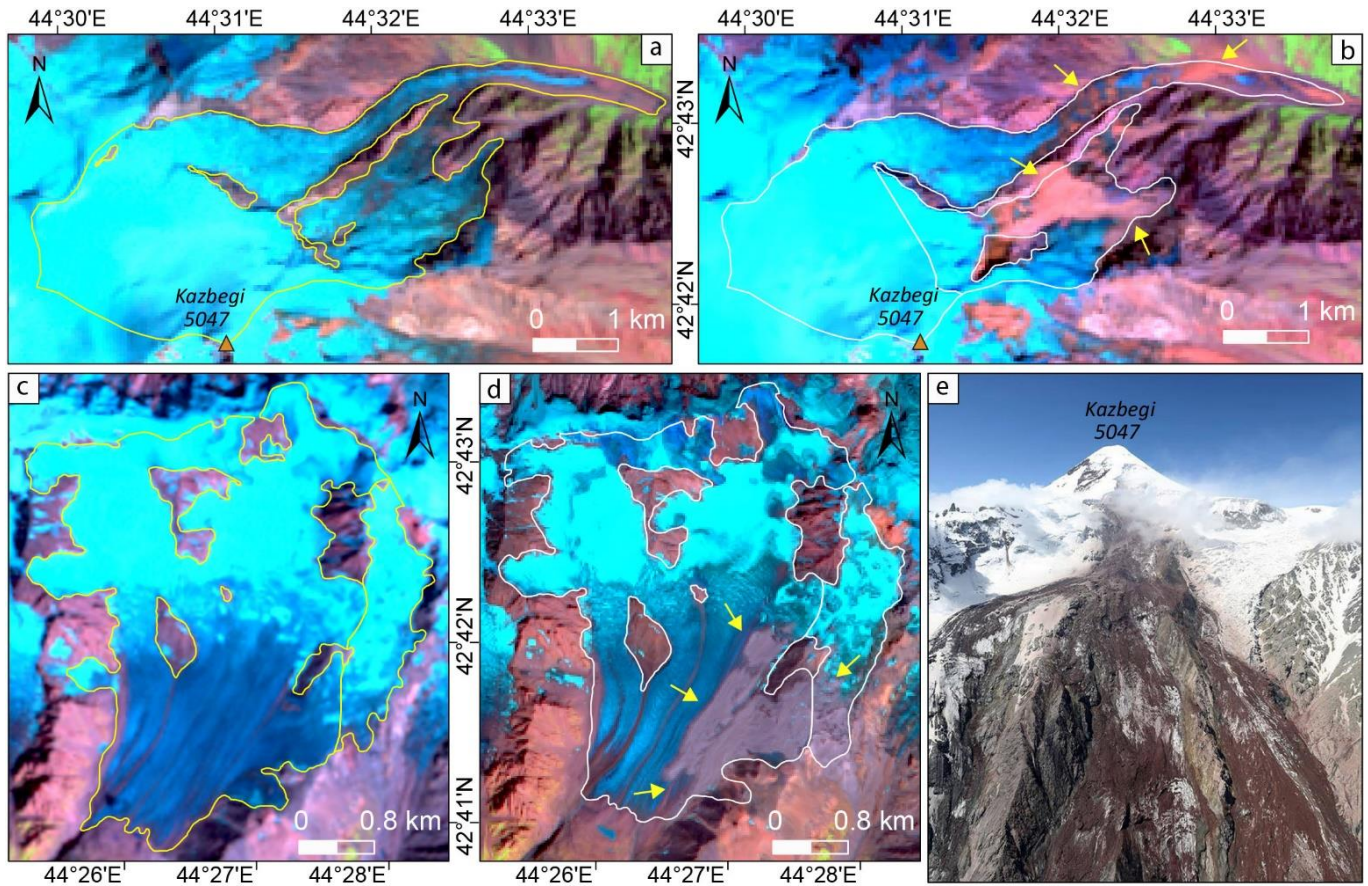

**Figure S6.** a – Devdoraki Glacier in 2000 (Landsat 7, 28/07/00); b – Devdoraki Glacier after rock-ice avalanche in 2014 (Landsat 8, 28/08/14). c – Suatisi Glacier in 2000 (Landsat 7, 28/07/00); d – Suatisi Glacier in 2014 (Landsat 8, 03/08/14). Yellow arrow shows increased supra-glacial debris cover area. e – Devdoraki Glacier oblique image showing increased supra-glacial debris cover area after rock-ice avalanche (18/04/14).
