# Supplementary material for: Supra-glacial debris cover changes in the Greater Caucasus from 1986 to 2014
Source: Copernicus journal article supplement (doi:10.5194/tc-14-585-2020), 2020-02-13
Supplement: Supplementary file 2 [file tc-14-585-2020-supplement.zip]

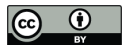

## *Supplement of*

# **Supra-glacial debris cover changes in the Greater Caucasus from 1986 to 2014**

**Levan G. Tielidze et al.**

*Correspondence to:* Levan G. Tielidze ([levan.tielidze@tsu.ge](mailto:levan.tielidze@tsu.ge))

- [tc-14-585-2020-supplement-title-page.pdf](#)
- Supplement
  - [Supraglacial\\_Supplement\\_Final\\_Tielidze.pdf](#)
  - [Tielidze et al.\\_Elbrus.gif.gif](#)

The copyright of individual parts of the supplement might differ from the CC BY 4.0 License.
