# Supplementary material for: Supra-glacial debris cover changes in the Greater Caucasus from 1986 to 2014
Source: Copernicus journal article supplement (doi:10.5194/tc-14-585-2020), 2020-02-13
Supplement: Supplementary file 3 [file tc-14-585-2020-supplement.zip]

Archive with 4 entries (3 files):
- Supplement/
- Supplement/Supraglacial_Supplement_Final_Tielidze.pdf
- Supplement/Tielidze et al._Elbrus.gif.gif
- tc-14-585-2020-supplement-title-page.pdf
