# Supplementary figures and images for: Supra-glacial debris cover changes in the Greater Caucasus from 1986 to 2014
Source: Copernicus journal article supplement (doi:10.5194/tc-14-585-2020), 2020-02-13

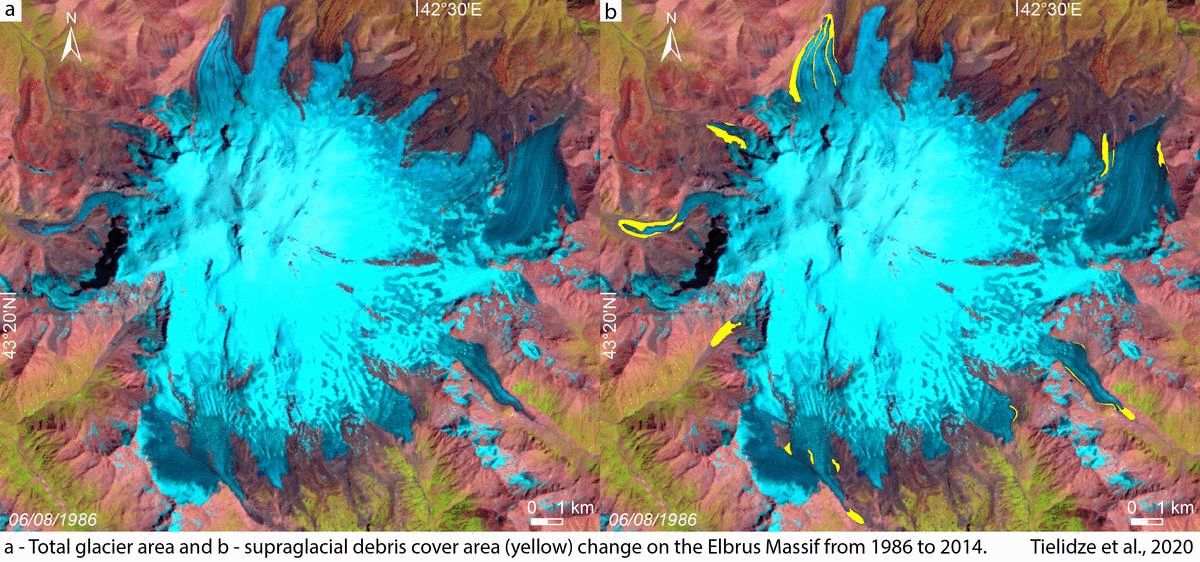

Supplement: Supplementary file 3 [file tc-14-585-2020-supplement.zip › Supplement/Tielidze et al._Elbrus.gif.gif]
